# Supplementary material for: Topical application of Urolithin A slows intrinsic skin aging and protects from UVB-mediated photodamage: Findings from Randomized Clinical Trials
Source: bioRxiv or medRxiv preprint supplement (doi:10.1101/2023.06.16.23291378), 2023-06-20

**A**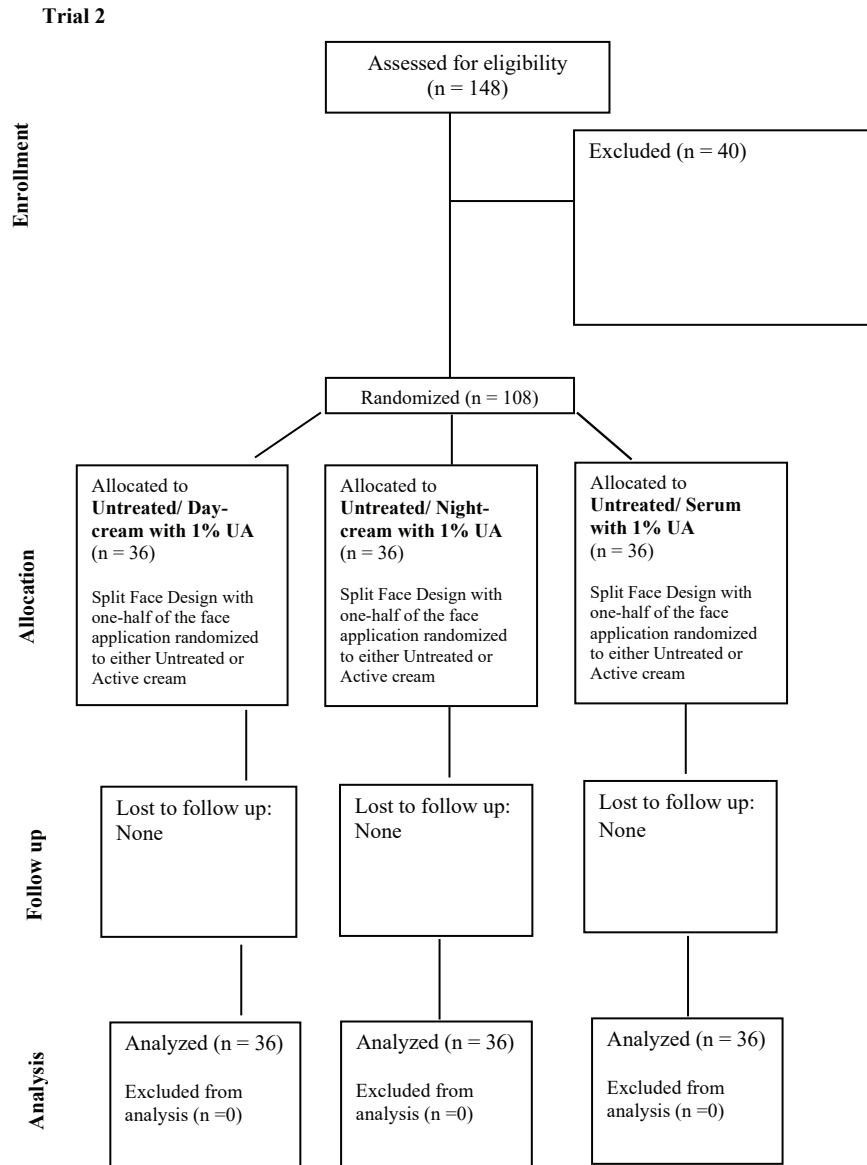**B**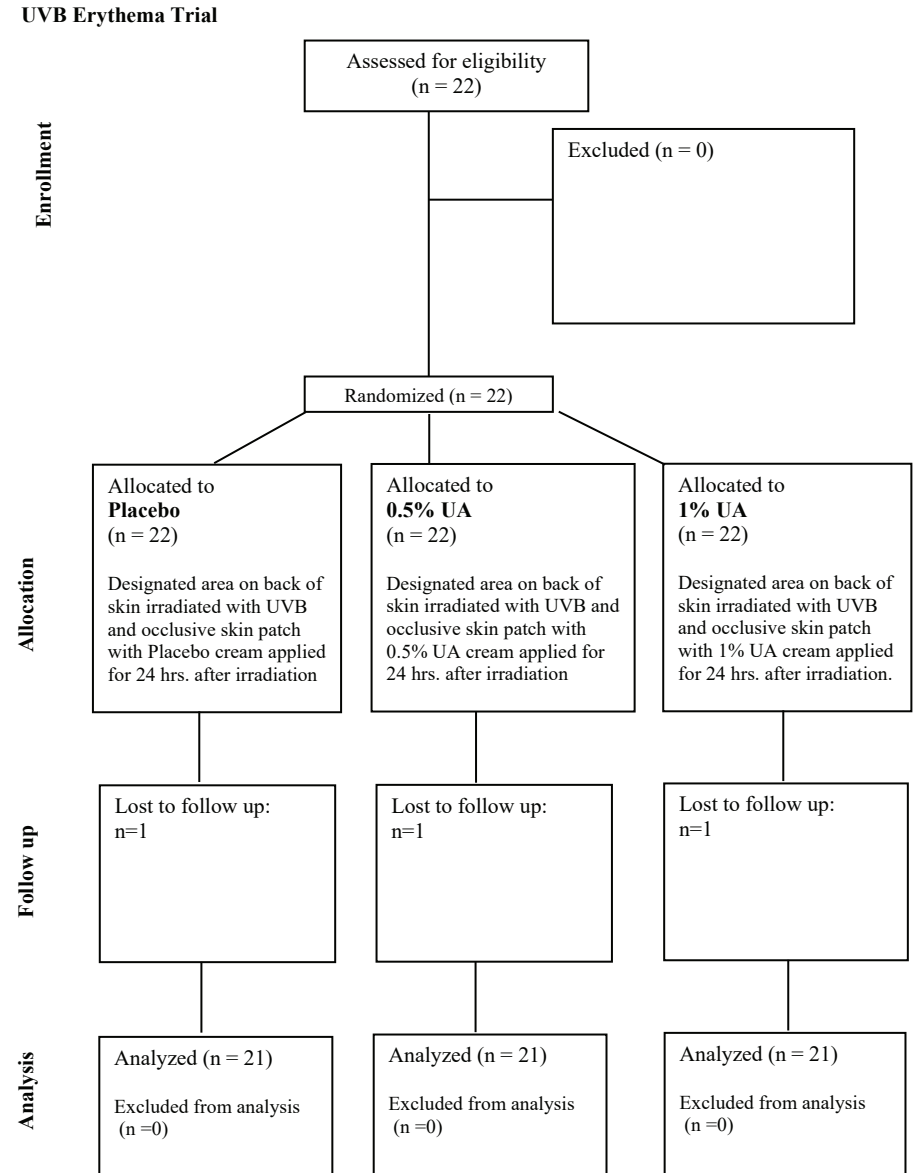

**A**

Collagen fibril organization  
(Fold change UA over vehicle)

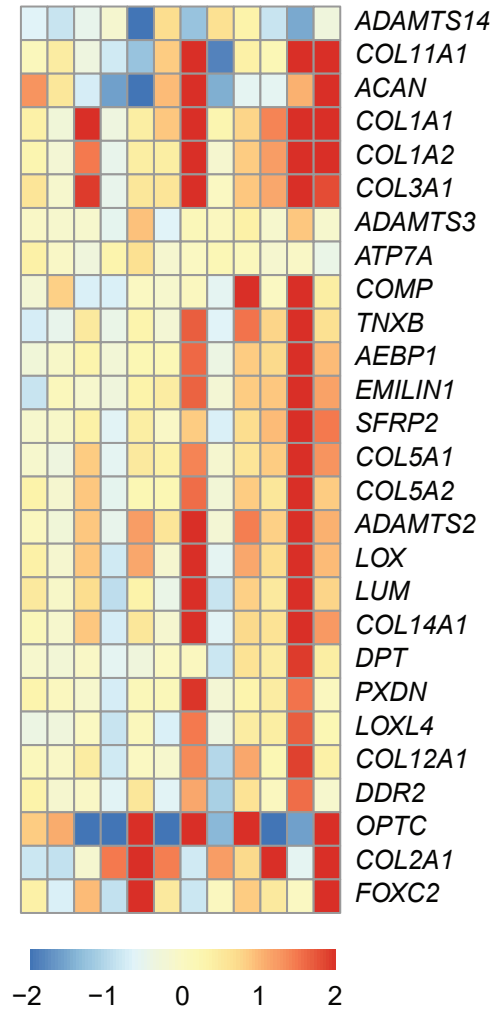**B**

Collagen fibril organization

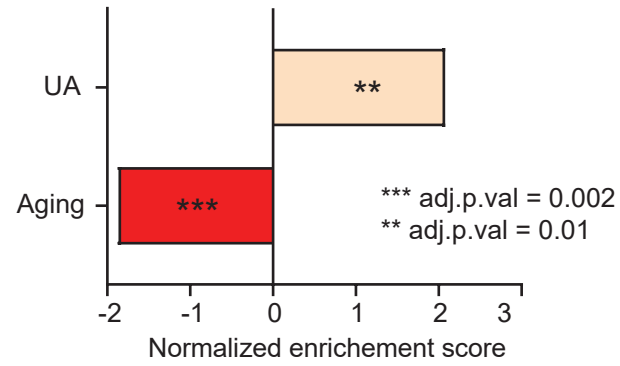**C**

Human dermal fibroblasts

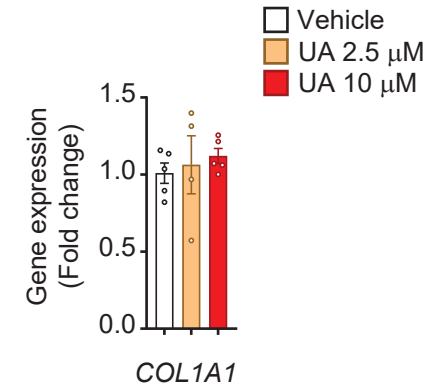**D**

Human reconstituted epidermis

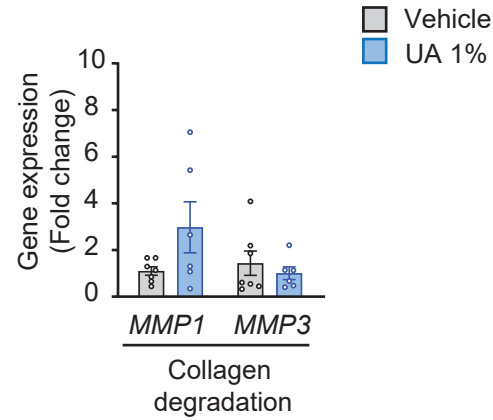

Supplement: Supplementary file [file media-1.pdf]
