# Supplementary material for: Topical application of Urolithin A slows intrinsic skin aging and protects from UVB-mediated photodamage: Findings from Randomized Clinical Trials
Source: bioRxiv or medRxiv preprint supplement (doi:10.1101/2023.06.16.23291378), 2023-06-20
Supplement: Supplementary file [file media-2.pdf]

#### Supplementary Table 4:

Skin capacitance as a function of skin hydration was measured on day 1 (baseline, before application of the test product), as well as after 2 weeks, 4 weeks and 8 weeks of product application.

Skin capacitance was measured by Corneometer [a.u.] An increase in Corneometer values correspond to a skin-moisturizing effect.

Mean values, standard deviations, treatment comparison on differences to baseline, and time comparison on raw data for **day-cream, night-cream and serum** containing 1% UA

#### A) Day-Cream containing 1% UA

| Time | Code | n  | Mean Values<br>± SD |                 | p-Values         |                  |              | Treat.<br>Comp. |
|------|------|----|---------------------|-----------------|------------------|------------------|--------------|-----------------|
|      |      |    |                     |                 | Time Comp.       |                  |              |                 |
|      |      |    | Raw Data            | Diff. to BL     | vs. BL           | vs. D15          | vs. D29      | vs. A           |
| BL   | A    | 36 | 55.50<br>± 11.38    | --              | --               | --               | --           | --              |
|      | B    | 36 | 55.38<br>± 11.86    | --              | --               | --               | --           | --              |
| D15  | A    | 35 | 55.31<br>± 12.45    | -0.31<br>± 9.71 | 0.849            | --               | --           | --              |
|      | B    | 35 | 61.30<br>± 10.98    | 5.92<br>± 10.34 | <b>0.002</b>     | --               | --           | <b>0.004</b>    |
| D29  | A    | 35 | 60.37<br>± 11.48    | 4.68<br>± 9.32  | <b>0.005</b>     | <b>&lt;0.001</b> | --           | --              |
|      | B    | 35 | 64.20<br>± 10.47    | 8.56<br>± 10.24 | <b>&lt;0.001</b> | <b>0.038</b>     | --           | <b>0.028</b>    |
| D57  | A    | 36 | 56.33<br>± 11.83    | 0.83<br>± 10.92 | 0.650            | 0.257            | <b>0.005</b> | --              |
|      | B    | 36 | 59.53<br>± 11.13    | 4.15<br>± 11.74 | <b>0.041</b>     | 0.356            | <b>0.010</b> | 0.151           |

**bold p-Value: significant (p≤0.05)**

A: Untreated side of the face; B: 1% UA Day-cream treated side of the face

#### B) Night-Cream containing 1% UA

| Time | Code | n  | Mean Values<br>± SD |                | p-Values         |         |         | Treat.<br>Comp.  |
|------|------|----|---------------------|----------------|------------------|---------|---------|------------------|
|      |      |    |                     |                | Time Comp.       |         |         |                  |
|      |      |    | Raw Data            | Diff. to BL    | vs. BL           | vs. D15 | vs. D29 | vs. A            |
| BL   | A    | 36 | 61.09<br>± 10.29    | --             | --               | --      | --      | --               |
|      | C    | 36 | 60.74<br>± 10.55    | --             | --               | --      | --      | --               |
| D15  | A    | 32 | 61.71<br>± 9.57     | 1.02<br>± 9.02 | 0.527            | --      | --      | --               |
|      | C    | 32 | 68.64<br>± 7.40     | 8.21<br>± 9.94 | <b>&lt;0.001</b> | --      | --      | <b>&lt;0.001</b> |

| Time | Code | n  | Mean Values<br>± SD |                  | p-Values     |         |              | Treat.<br>Comp.  |
|------|------|----|---------------------|------------------|--------------|---------|--------------|------------------|
|      |      |    |                     |                  | Time Comp.   |         |              |                  |
|      |      |    | Raw Data            | Diff. to BL      | vs. BL       | vs. D15 | vs. D29      | vs. A            |
| D29  | A    | 36 | 63.92<br>± 10.57    | 2.82<br>± 10.42  | 0.113        | 0.160   | --           | --               |
|      | C    | 36 | 67.28<br>± 7.88     | 6.54<br>± 11.48  | <b>0.002</b> | 0.110   | --           | <b>0.016</b>     |
| D57  | A    | 32 | 58.71<br>± 13.26    | -1.92<br>± 12.86 | 0.406        | 0.164   | <b>0.005</b> | --               |
|      | C    | 32 | 66.39<br>± 10.33    | 5.81<br>± 12.30  | <b>0.012</b> | 0.353   | 0.327        | <b>&lt;0.001</b> |

**bold p-Value: significant (p≤0.05)**

A: Untreated side of the face; C: 1% UA Night-cream treated side of the face

### C) Serum containing 1% UA

| Time | Code | n  | Mean Values<br>± SD |                  | p-Values         |         |              | Treat.<br>Comp.  |
|------|------|----|---------------------|------------------|------------------|---------|--------------|------------------|
|      |      |    |                     |                  | Time Comp.       |         |              |                  |
|      |      |    | Raw Data            | Diff. to BL      | vs. BL           | vs. D15 | vs. D29      | vs. A            |
| BL   | A    | 34 | 55.76<br>± 10.04    | --               | --               | --      | --           | --               |
|      | E    | 34 | 54.49<br>± 9.62     | --               | --               | --      | --           | --               |
| D15  | A    | 32 | 53.28<br>± 11.45    | -2.20<br>± 9.76  | 0.212            | --      | --           | --               |
|      | E    | 32 | 65.20<br>± 12.03    | 11.14<br>± 14.43 | <b>&lt;0.001</b> | --      | --           | <b>&lt;0.001</b> |
| D29  | A    | 33 | 55.68<br>± 9.76     | 0.02<br>± 9.92   | 0.991            | 0.077   | --           | --               |
|      | E    | 33 | 62.98<br>± 8.70     | 8.70<br>± 11.32  | <b>&lt;0.001</b> | 0.236   | --           | <b>&lt;0.001</b> |
| D57  | A    | 34 | 51.82<br>± 9.09     | -3.94<br>± 10.56 | <b>0.037</b>     | 0.486   | <b>0.020</b> | --               |
|      | E    | 34 | 63.95<br>± 7.99     | 9.46<br>± 11.77  | <b>&lt;0.001</b> | 0.573   | 0.330        | <b>&lt;0.001</b> |

**bold p-Value: significant (p≤0.05)**

A: Untreated side of the face; E: 1% UA Serum treated side of the face

BL: Baseline; D15: Day 2-weeks of application; D29: 4 weeks of application; D57: 8 weeks of application
