# Supplementary material for: Topical application of Urolithin A slows intrinsic skin aging and protects from UVB-mediated photodamage: Findings from Randomized Clinical Trials
Source: bioRxiv or medRxiv preprint supplement (doi:10.1101/2023.06.16.23291378), 2023-06-20
Supplement: Supplementary file [file media-3.pdf]

**Supplementary Table 3:**

Measurements by DermaTOP of skin roughness (wrinkle) - Mean values, standard deviations, treatment comparison on differences to baseline, and time comparison on raw data for serum containing 1% UA

| Parameter                               | Time | Code | n  | Mean Values<br>± SD |                 | Treat. Comp. |
|-----------------------------------------|------|------|----|---------------------|-----------------|--------------|
|                                         |      |      |    | Raw Data            | Diff. to BL     | vs. A        |
| Skin Roughness - Ra<br>by DermaTOP [µm] | BL   | A    | 34 | 22.10<br>± 5.80     | --              | --           |
|                                         |      | E    | 34 | 22.97<br>± 5.46     | --              | --           |
|                                         | D15  | A    | 32 | 23.84<br>± 6.71     | 1.79<br>± 4.47  | --           |
|                                         |      | E    | 32 | 22.14<br>± 4.92     | -0.49<br>± 3.00 | <b>0.036</b> |
|                                         | D57  | A    | 34 | 22.62<br>± 6.40     | 0.52<br>± 3.19  | --           |
|                                         |      | E    | 33 | 21.64<br>± 5.02     | -1.46<br>± 3.59 | <b>0.044</b> |

**A:** Untreated side of the face; **E:** 1% UA Serum treated side of the face

Ra: average skin roughness;

BL: Baseline; D15: Day 2-weeks of application; D57: 8 weeks of application
