# Supplementary material for: Topical application of Urolithin A slows intrinsic skin aging and protects from UVB-mediated photodamage: Findings from Randomized Clinical Trials
Source: bioRxiv or medRxiv preprint supplement (doi:10.1101/2023.06.16.23291378), 2023-06-20
Supplement: Supplementary file [file media-4.pdf]

### Supplementary Table 2:

Measurements by DermaTOP of skin roughness (wrinkle) - Mean values, standard deviations, treatment comparison on differences to baseline, and time comparison on raw data for day-cream containing 1% UA

| Parameter                               | Time | Code | n  | Mean Values<br>± SD |                   | Treat. Comp. |
|-----------------------------------------|------|------|----|---------------------|-------------------|--------------|
|                                         |      |      |    | Raw Data            | Diff. to BL       | vs. A        |
| Skin Roughness - Ra<br>by DermaTOP [µm] | BL   | A    | 33 | 27.41<br>± 7.14     | --                | --           |
|                                         |      | B    | 34 | 28.36<br>± 8.05     | --                | --           |
|                                         | D15  | A    | 34 | 27.22<br>± 8.13     | -0.44<br>± 4.25   | --           |
|                                         |      | B    | 34 | 24.87<br>± 7.33     | -3.33<br>± 3.47   | <0.001       |
|                                         | D57  | A    | 35 | 27.41<br>± 10.32    | -1.29<br>± 5.72   | --           |
|                                         |      | B    | 35 | 24.65<br>± 7.61     | -3.81<br>± 4.79   | 0.008        |
| Skin Roughness - Rz<br>by DermaTOP [µm] | BL   | A    | 33 | 111.41<br>± 34.99   | --                | --           |
|                                         |      | B    | 34 | 114.43<br>± 33.63   | --                | --           |
|                                         | D15  | A    | 34 | 111.01<br>± 37.95   | -1.49<br>± 18.87  | --           |
|                                         |      | B    | 34 | 99.62<br>± 29.05    | -13.79<br>± 17.49 | <0.001       |
|                                         | D57  | A    | 35 | 111.89<br>± 46.78   | -5.85<br>± 26.37  | --           |
|                                         |      | B    | 35 | 97.70<br>± 31.16    | -17.08<br>± 20.99 | 0.009        |

**A:** Untreated side of the face; **B:** 1% UA Treated side of the face

Ra: average skin roughness; Rz: maximum skin roughness

BL: Baseline; D15: Day 2-weeks of application; D57: 8 weeks of application
